# Supplementary material for: Degradable plastics could help to protect the marine environment: proof based on pollutant surface behaviors
Source: Royal Society of Chemistry journal article supplement (doi:10.1039/d5nj00296f), 2025-01-01
Supplement: d5nj00296f1.pdf [file d5nj00296f1.pdf]

## **Degradable plastics could do favor to protect the marine environment: Proof based on pollutant surface behaviors**

Xiaotao Liu <sup>a</sup>, Xueting Hua <sup>b</sup>, Jian Lu<sup>b\*</sup>, Jun Wu <sup>a</sup>, Yuexia Feng <sup>b</sup>

<sup>a</sup> College of Materials Science and Chemical Engineering, Harbin Engineering University, Harbin,  
Heilongjiang 150001, P.R. China

<sup>b</sup> CAS Key Laboratory of Coastal Environmental Processes and Ecological Remediation, Yantai  
Institute of Coastal Zone Research (YIC), Chinese Academy of Sciences (CAS); Shandong Key  
Laboratory of Coastal Environmental Processes, YICCAS, Yantai, Shandong 264003, P.R. China

\* Corresponding author: Jian Lu

**E-mail address:** jlu@yic.ac.cn (J. Lu)

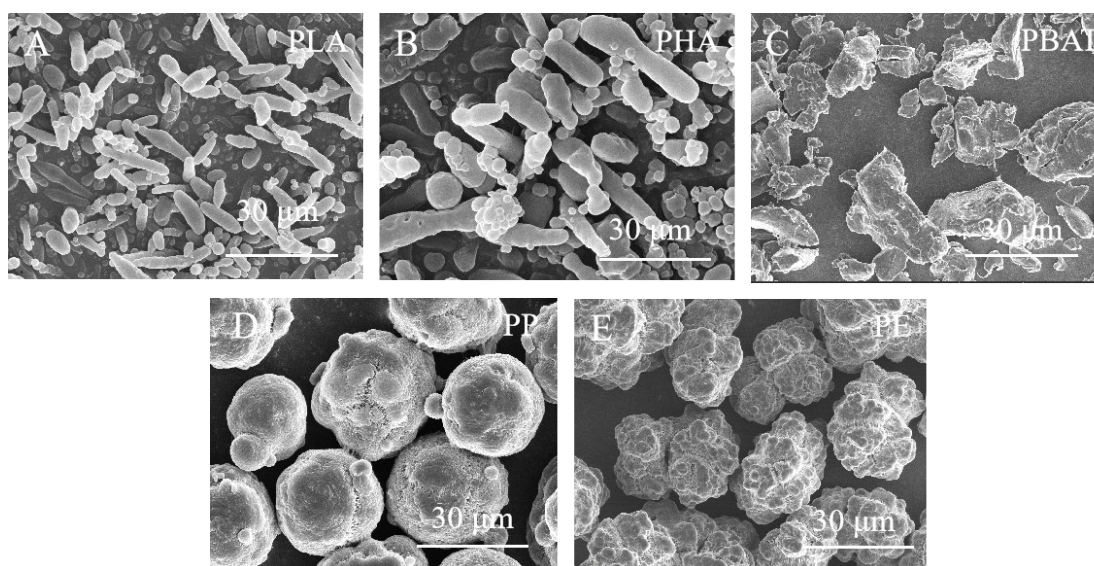

**Figure S1.** the SEM of PLA (B), PHA (C), PBAT (D), PP (E) and PE (F).

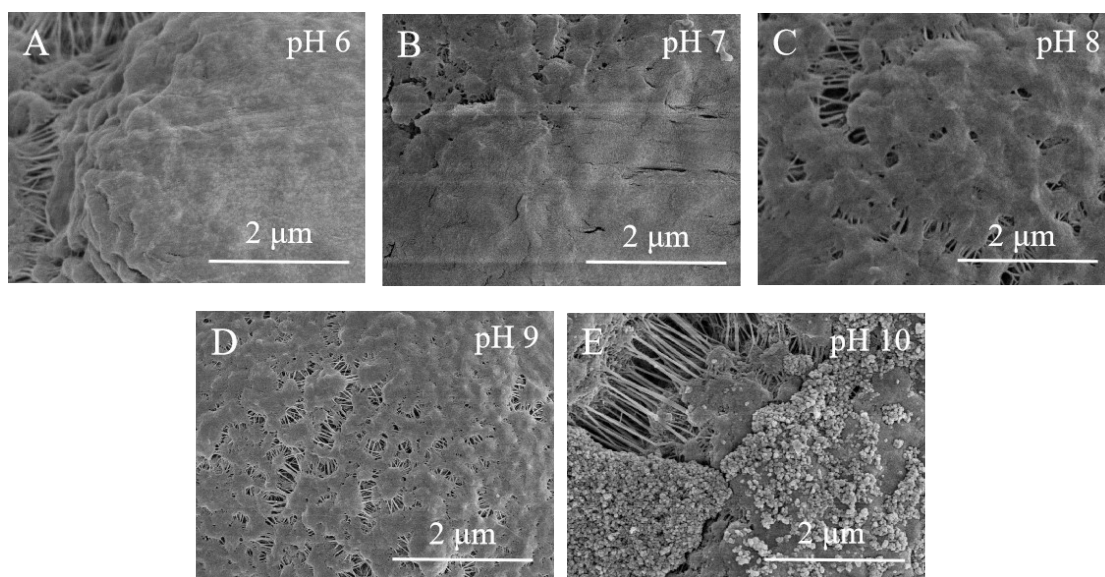

**Figure S2.** The SEM of PE microplastics under different pH conditions.

**Table S1.** The zeta potential of microplastics under different pH conditions.

| type | pH 6 (mV) | pH 7 (mV) | pH 8 (mV) | pH 9 (mV) | pH 10 (mV) |
|------|-----------|-----------|-----------|-----------|------------|
| PLA  | -3.59     | -6.63     | -11.4     | -14.7     | -18.9      |
| PHA  | -7.72     | -10.2     | -15.8     | -18.6     | -27.0      |
| PBAT | -6.07     | -10.5     | -15.7     | -19.2     | -24.5      |
| PP   | -6.16     | -9.35     | -15.0     | -20.3     | -24.1      |
| PE   | -4.38     | -7.81     | -16.2     | -19.1     | -22.4      |
